# Supplementary material
Source: ML conference proceedings conference paper supplement (https://aclanthology.org/2026.semeval-1.228)

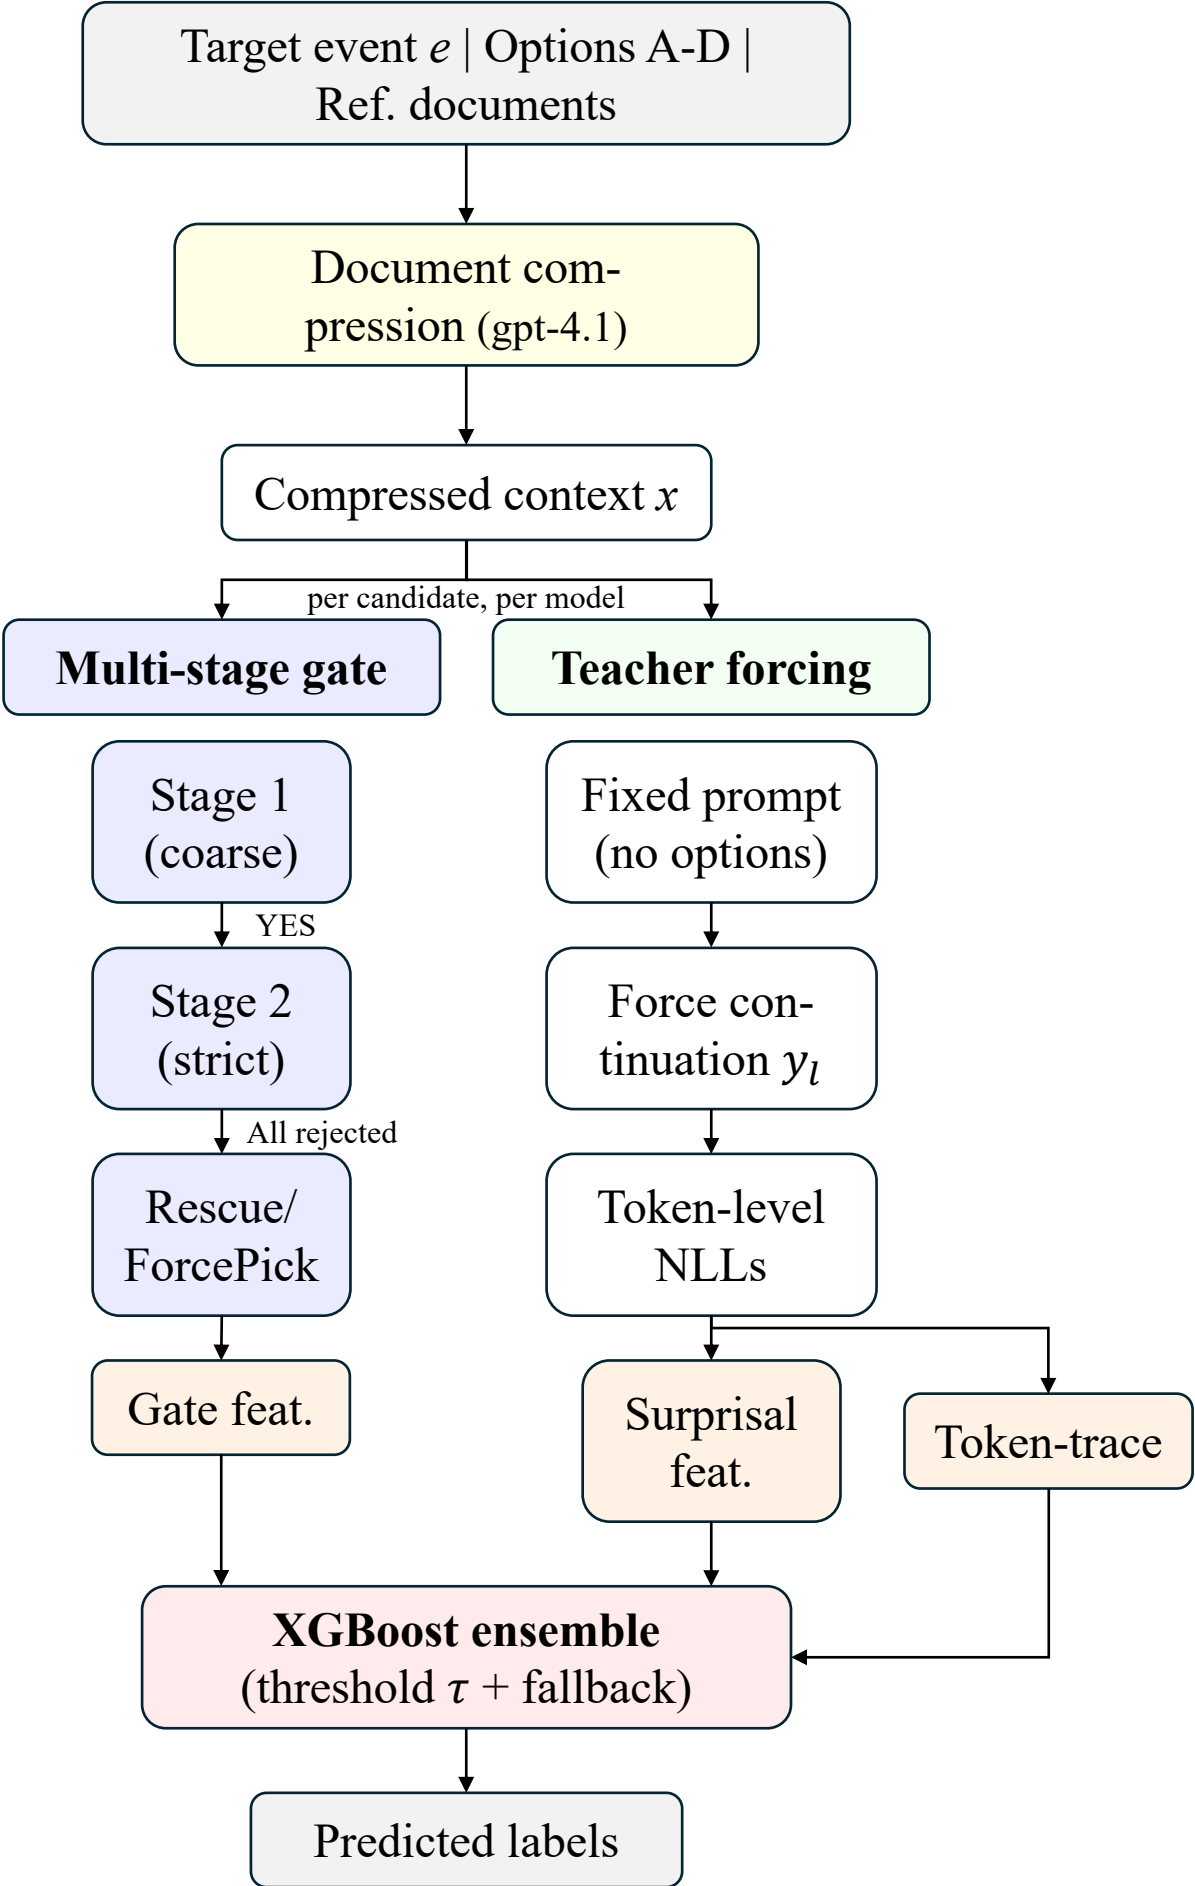

Supplement: SupplementaryMaterial [file system_overview.pdf › system_overview.pdf]
